# Supplementary material for: Analyzing Document-Duplication Effects on Policies for Browser and Proxy Caching
Source: Atypon-hosted journal article supplement (doi:10.1287/ijoc.1040.0118), 2006-11-01
Supplement: ijoc.1040.0118-sm-tan_et_al.pdf [file ijoc.1040.0118-sm-tan_et_al.pdf]

# Online Supplement to Analyzing Document-Duplication Effects on Policies for Browser and Proxy Caching

*INFORMS Journal on Computing*

Yong Tan

University of Washington Business School, Box 353200, Seattle, Washington 98195-3200, USA,  
ytan@u.washington.edu

Yonghua Ji

University of Alberta School of Business, Edmonton, Alberta T6G2R6, Canada,  
yji@ualberta.ca

Vijay S. Mookerjee

University of Texas at Dallas, School of Management, JO4.624, Richardson, Texas 75803-0688, USA,  
vijaym@utdallas.edu

## Appendix

### A1. Derivation of Probability Density

The probability density of documents with strictly positive ages at time  $t + h$  is given by the probability density of documents ages reduced by  $h$  at time  $= t$ , *multiplied by* the probability that there are no accesses made by the user in the interval  $[t, t + h]$ .

Let,  $\Pi(h)$  be the probability that no accesses take place in  $h$  time units on any of the  $n$  documents with positive ages given by  $x_1 - h, \dots, x_n - h$ ,

$$\Pi(h) = 1 - \sum_{i=1}^n \int_{x_i-h}^{x_i} \theta(x_i) dx_i. \quad (A1)$$

In the equation above, we have used the property of a Poisson distribution that the probability of two or more access on a document in a short time interval  $h$  can be ignored. We get the following differential equation:

$$f_{t,n}(t+h, x_1, \dots, x_n) = \Pi(h) f_{t,n}(t, x_1 - h, \dots, x_n - h). \quad (A2)$$

Dividing throughout by  $h$  and taking limits  $h \rightarrow 0$ ,  $t \rightarrow \infty$ , we get the required steady state equation,

$$\sum_{i=1}^n \frac{\partial f_n(x_1, \dots, x_n)}{\partial x_i} = - \sum_{i=1}^n \theta(x_i) f_n(x_1, \dots, x_n). \quad (A3)$$

The probability density that there is one document of zero age and the others are of positive ages is given by the probability density of a system with all documents of positive ages *multiplied* by the probability that any document in the system is accessed. Note that since a single user generates the access requests, two or more documents cannot be simultaneously accessed. We get the following boundary condition:

$$f_n(x_1, x_2, \dots, x_i = 0, \dots, x_n) = \int_0^{\infty} \theta(x_i) f_n(x_1, x_2, \dots, x_i, \dots, x_n) dx_i. \quad (\text{A4})$$

The differential equation and boundary condition defined in (A3) and (A4) can be verified to have the following solution:

$$f_n(x_1, x_2, \dots, x_n) = \omega \exp\left(-\sum_{i=1}^n \phi(x_i)\right), \quad (\text{A5})$$

where  $\omega$  is a normalizing constant that ensures that  $f_n(x_1, x_2, \dots, x_n)$  integrates to unity over the appropriate limits and  $\phi(x)$  is the indefinite integral of  $\theta(x)$ .

## A2. Evaluation of $w(n, R)$

The expression  $w(n, R)$  is the expected delay when there are  $n$  documents, browser capacity is  $R$ , and no proxy server is present, explicitly,

$$w(n, R) = n! \int_0^{1/\beta} f_\theta(\theta_1) d\theta_1 \int_0^{\theta_1} f_\theta(\theta_2) d\theta_2 \cdots \int_0^{\theta_{n-1}} f_\theta(\theta_n) d\theta_n \sum_{i=R+1}^n Z \frac{\theta_i}{H_0}.$$

Substituting in the explicit expression of  $f_\theta(\theta)$ , and have  $y = \beta\theta$ , we have,

$$w(n, R) = n! \left(\frac{1}{\alpha} - 1\right)^n \int_0^1 y_1^{\frac{1}{\alpha}-2} dy_1 \cdots \int_0^{y_{R-1}} y_R^{\frac{1}{\alpha}-2} dy_R \int_0^{y_R} y_{R+1}^{\frac{1}{\alpha}-2} dy_{R+1} \cdots \int_0^{y_{n-1}} y_n^{\frac{1}{\alpha}-2} dy_n \frac{1}{\beta} \sum_{i=R+1}^n \frac{y_i Z}{H_0}.$$

This gives,

$$w(n, R) = n! \left(\frac{1}{\alpha} - 1\right)^n \frac{1}{\beta} \frac{Z}{H_0} \sum_{k=1}^{n-R} \prod_{j=1}^{k-1} \frac{1}{j(1/\alpha - 1)} \prod_{i=k}^n \frac{1}{i(1/\alpha - 1) + 1}.$$

By induction, we have,

$$\sum_{k=1}^l \prod_{j=1}^{k-1} \frac{1}{j(1/\alpha - 1)} \prod_{i=k}^l \frac{1}{i(1/\alpha - 1) + 1} = \frac{\alpha}{(1/\alpha - 1)^{l-1} (l-1)!}.$$

Therefore,

$$\begin{aligned} w(n, R) &= n! \left(\frac{1}{\alpha} - 1\right)^n \frac{1}{\beta} \frac{Z}{H_0} \frac{\alpha}{(1/\alpha - 1)^{n-R-1} (n-R-1)!} \prod_{i=n-R+1}^n \frac{1}{i(1/\alpha - 1) + 1} \\ &= Z \left(1 - \frac{R}{n}\right) \prod_{i=n-R+1}^n \left(1 + \frac{\alpha}{i(1-\alpha)}\right)^{-1}. \end{aligned}$$

### A3. Evaluation of $w_1$ and $w_2$

We first evaluate the conditional expectation,

$$\int_0^{\tilde{\theta}} \theta f_c(\theta | \tilde{\theta}) d\theta,$$

which can be written as,

$$\int_0^{\tilde{\theta}} \theta \frac{f_{2,\theta}(\theta, \tilde{\theta})}{g_\theta(\tilde{\theta})} d\theta = \frac{1}{g_\theta(\tilde{\theta})} \left( \int_0^{\tilde{\theta}} \theta f_\theta(\theta) g_\theta(\tilde{\theta}_{-1} = \tilde{\theta}) d\theta + \tilde{\theta} f_\theta(\tilde{\theta}) P_\theta(\tilde{\theta}_{-1} \leq \tilde{\theta}) \right) = b(m) \tilde{\theta},$$

where the subscript  $\theta$  indicates the transformed (from  $x$  to  $\theta$ ) probability, or probability density, functions, and

$$b(m) = m^{-1}((1 - \alpha)(m - 1) + 1).$$

Here,  $\tilde{\theta}_{-1}$  is the maximum of access rates to that document for other  $m - 1$  users.

Now, we can simplify,

$$w_1 = \frac{n!}{(n - r)!} \frac{Z_p Z}{H_0} b(m) \int_0^\infty g(\tilde{x}_1) d\tilde{x}_1 \cdots \int_{\tilde{x}_{r-1}}^\infty g(\tilde{x}_r) d\tilde{x}_r \sum_{i=1}^r \tilde{\theta}_i (P(\tilde{\theta} \leq \tilde{\theta}_i))^{n-r},$$

where the integral over documents outside the proxy cache is evaluated, using the explicit expressions given by (8) and (9) in the paper. Furthermore, we make a substitution,

$$y_i = P(\tilde{x} \geq \tilde{x}_i) = P_\theta(\tilde{\theta} \leq \tilde{\theta}_i).$$

This yields,

$$\begin{aligned} w_1 &= \frac{n!}{(n - r)!} \frac{Z_p Z}{\beta H_0} b(m) \int_0^1 dy_1 \cdots \int_0^{y_{r-1}} dy_r \sum_{i=1}^r y_i^{\frac{\alpha}{m(1-\alpha)}} y_r^{n-r} \\ &= \frac{Z_p Z}{n(1 - \alpha)} b(m) \text{Factor}_p, \end{aligned}$$

where

$$\text{Factor}_p = \sum_{i=1}^r \prod_{j=n-r+i}^n \left( 1 + \frac{\alpha}{jm(1 - \alpha)} \right)^{-1}.$$

The expected delay due to original server,  $w_2$ , can be written as,

$$\begin{aligned} w_2 &= n! \int_0^\infty g(\tilde{x}_1) d\tilde{x}_1 \int_{\tilde{x}_1}^\infty g(\tilde{x}_2) d\tilde{x}_2 \cdots \int_{\tilde{x}_{r-1}}^\infty g(\tilde{x}_r) d\tilde{x}_r (P(\tilde{x}_{-1} \geq \tilde{x}_r))^{n-r} \int_{\tilde{x}_r}^\infty f(x_{r+1}) dx_{r+1} \\ &\quad \times \int_{\tilde{x}_{r+1}}^\infty f(x_{r+2}) dx_{r+2} \cdots \int_{x_{n-1}}^\infty f(x_n) dx_n \sum_{i=r+R+1}^n \frac{\theta(x_i) Z}{H_0}, \end{aligned}$$

where we substitute in the expression of  $F_2(x, \tilde{x} \geq \bar{x})$ , i.e., (10) in the paper. We can further simplify,

$$w_2 = w(n-r, R) \left(1 - \frac{r}{n}\right) \text{Factor}_{\text{G-LRU}},$$

where,

$$\begin{aligned} \text{Factor}_{\text{G-LRU}} &= \frac{n!}{(n-r)!} \int_0^1 d(\beta\theta_1)^{m(1-\alpha)/\alpha} \dots \int_0^{\beta\theta_{r-1}} d(\beta\theta_r)^{m(1-\alpha)/\alpha} (\beta\theta_r)^{m(1-\alpha)(n-r)/\alpha+1} \\ &= \frac{n!}{(n-r)!} \prod_{i=n-r+1}^n \left(i + \frac{\alpha}{m(1-\alpha)}\right)^{-1} = \prod_{i=n-r+1}^n \left(1 + \frac{\alpha}{im(1-\alpha)}\right)^{-1}. \end{aligned}$$

#### A4. Approximations

In the limit where  $n$  and  $n-r$  are large, the following approximation holds,

$$\prod_{k=n-r+1}^n \left(1 + \frac{q}{k}\right)^{-1} = \frac{\Gamma(n+1+q)\Gamma(n-r+1)}{\Gamma(n+1)\Gamma(n-r+1+q)} \approx \left(1 - \frac{r}{n}\right)^q,$$

where  $\Gamma(z)$  is the Gamma function. To prove the above expression, we make use of the following approximation of the Gamma function,

$$\ln \Gamma(z) \approx z \ln z - z - \ln z / 2,$$

for large  $z$ . The error term is of the order  $n^{-1}$ .

We have,

$$\text{Factor}_{\text{G-LRU}} = \prod_{i=n-r+1}^n \left(1 + \frac{\alpha}{im(1-\alpha)}\right)^{-1} \approx \left(1 - \frac{r}{n}\right)^{\frac{\alpha}{m(1-\alpha)}};$$

and,

$$\begin{aligned} \text{Factor}_p &= \sum_{i=1}^r \prod_{j=n-r+i}^n \left(1 + \frac{\alpha}{jm(1-\alpha)}\right)^{-1} \\ &\approx \sum_{i=1}^r \left(1 - \frac{i}{n}\right)^{\frac{\alpha}{m(1-\alpha)}} \approx \frac{nm(1-\alpha)}{\alpha + m(1-\alpha)} \left(1 - \left(1 - \frac{r}{n}\right)^{1 + \frac{\alpha}{m(1-\alpha)}}\right). \end{aligned}$$

The expected delay  $w_1$  can be approximated as,

$$\begin{aligned} w_1 &= \frac{Z_p Z}{n(1-\alpha)} \frac{(1-\alpha)(m-1)+1}{m} \text{Factor}_p \\ &\approx \frac{Z_p Z}{n(1-\alpha)} \frac{(1-\alpha)m + \alpha}{m} \frac{nm(1-\alpha)}{\alpha + m(1-\alpha)} \left(1 - \left(1 - \frac{r}{n}\right)^{1 + \frac{\alpha}{m(1-\alpha)}}\right) \\ &= Z_p Z \left(1 - \left(1 - \frac{r}{n}\right)^{1 + \frac{\alpha}{m(1-\alpha)}}\right). \end{aligned}$$

## A5. Evaluation of $L$ -policy

**Full Duplication.** Given a value of  $j$ , the conditional expectation of the binary variable  $\varphi_k$  is,

$$\mathbf{E}_{\varphi;j} \circ \varphi_k = \frac{r-j}{n-R},$$

for  $k = R+1, \dots, n$ . All  $(n-R)$  documents are equally likely to be tagged. It can be shown that,

$$\sum_{j=0}^R p_j^d \frac{r-j}{n-R} = \frac{r}{n}.$$

Substituting in the expected value of  $\varphi_k$  and carrying out the integrals, we get,

$$\sum_{j=0}^R p_j^d \left( \frac{r-j}{n-R} Z_p Z + \frac{n-R-r+j}{n-R} Z \right) \frac{1}{(1-\alpha)n} \sum_{k=R+1}^n \prod_{l=n-k+1}^n \left( 1 + \frac{\alpha}{l(1-\alpha)} \right)^{-1}.$$

After averaging over  $j$ , the expected delay becomes,

$$\left( \frac{r}{n} Z_p Z + \left( 1 - \frac{r}{n} \right) Z \right) \frac{n-R}{n} \prod_{l=n-R+1}^n \left( 1 + \frac{\alpha}{l(1-\alpha)} \right)^{-1}.$$

This is nothing but the expression for our base case.

**No Duplication.** Similarly, for a given a value of  $i$ , the conditional expectation of the binary variable  $\varphi_k$  is,

$$\mathbf{E}_{\varphi;i} \circ \varphi_k = \begin{cases} \frac{i}{R+i-1}, & \text{if } k \leq R+i-1; \\ \frac{r-i}{n-R-i}, & \text{if } k \geq R+i+1. \end{cases}$$

The  $(R+i)^{\text{th}}$  document is not tagged. One can verify that,

$$\sum_{i=0}^r p_i^{nd} \frac{i}{R+i-1} = \frac{r}{n} \text{ and } \sum_{i=0}^r p_i^{nd} \frac{r-i}{n-R-i} = \frac{r}{n}.$$

The expected delay can be reduced to, after evaluating the integrals,

$$\begin{aligned} & \sum_{i=0}^r p_i^{nd} \frac{i}{R+i-1} Z_p Z \left( 1 - \frac{n-R-i+1}{n} \prod_{l=n-R-i+2}^n \left( 1 + \frac{\alpha}{l(1-\alpha)} \right)^{-1} \right) \\ & + \sum_{i=0}^r p_i^{nd} \left( \frac{r-i}{n-R-i} Z_p Z + \frac{n-R-r}{n-R-i} Z \right) \frac{n-R-i}{n} \prod_{l=n-R-i+1}^n \left( 1 + \frac{\alpha}{l(1-\alpha)} \right)^{-1}. \end{aligned}$$

We carry out the summation over  $i$ . This gives,

$$\frac{r}{n} Z_p Z + \frac{n-R-r}{n} \sum_{i=0}^r p_i^{nd} \prod_{l=n-R-i+1}^n \left( 1 + \frac{\alpha}{l(1-\alpha)} \right)^{-1} Z.$$

**Partial Duplication.** We start with the probability of  $j$  tagged documents for the first  $L$  documents,  $p(j)$ ,

$$p(j) = \sum_{i=0}^{r-j} p(j, i) = \binom{L}{j} \binom{n-L}{r-j} \binom{n}{r}^{-1}.$$

This gives the conditional probability of  $i$  tagged documents for documents ranked from the  $(L+1)^{th}$  to the  $(R+i-1)^{th}$ ,

$$p(i|j) = \frac{p(j, i)}{p(j)} = \binom{R-L+i-1}{i} \binom{n-R-i}{r-j-i} \binom{n-L}{r-j}^{-1}.$$

The  $(R+i)^{th}$  document should not be tagged. Similarly, for given  $j$  and  $i$ , each document has a probability of,

$$\mathbf{E}_{\varphi_{j,i}} \circ \varphi_k = \begin{cases} \frac{i}{R-L+i-1}, & \text{if } L+1 \leq k \leq R+i-1; \\ \frac{r-j-i}{n-R-i}, & \text{if } k \geq R+i+1. \end{cases}$$

being tagged. We also have,

$$\sum_{i=0}^{r-j} p(i|j) \frac{i}{R-L+i-1} = \frac{r-j}{n-L} \quad \text{and} \quad \sum_{i=0}^{r-j} p(i|j) \frac{r-j-i}{n-R-i} = \frac{r-j}{n-L}.$$

For given  $j$  and  $i$ , the expected delay can be expressed as,

$$\begin{aligned} & \frac{i}{L-R+i-1} Z_p Z \left( \frac{n-L}{n} \prod_{l=n-L+1}^n \left( 1 + \frac{\alpha}{l(1-\alpha)} \right)^{-1} - \frac{n-R-i+1}{n} \prod_{l=n-R-i+2}^n \left( 1 + \frac{\alpha}{l(1-\alpha)} \right)^{-1} \right) \\ & + \left( \frac{r-j-i}{n-R-i} Z_p Z + \frac{n-R-r-j}{n-R-i} Z \right) \frac{n-R-i}{n} \prod_{l=n-R-i+1}^n \left( 1 + \frac{\alpha}{l(1-\alpha)} \right)^{-1}. \end{aligned}$$

We average the above expression over  $i$ . This yields,

$$\frac{r-j}{n} \prod_{l=n-L+1}^n \left( 1 + \frac{\alpha}{l(1-\alpha)} \right)^{-1} Z_p Z + \frac{n-R-r+j}{n} \sum_{i=0}^{r-j} p(i|j) \prod_{l=n-R-i+1}^n \left( 1 + \frac{\alpha}{l(1-\alpha)} \right)^{-1} Z,$$

which can be further reduced, after averaging over  $j$ , to,

$$\frac{r}{n} \frac{n-L}{n} \prod_{l=n-L+1}^n \left( 1 + \frac{\alpha}{l(1-\alpha)} \right)^{-1} Z_p Z + \sum_{j=0}^L \sum_{i=0}^{r-j} p(j, i) \frac{n-R-r+j}{n} \prod_{l=n-R-i+1}^n \left( 1 + \frac{\alpha}{l(1-\alpha)} \right)^{-1} Z.$$

## A6. Approximation for Equation (35)

If the ratios  $r/n$  and  $R/n$  are small, we can expand

$$w(n, R+i) \approx 1 - \frac{1}{1-\alpha} \frac{R+i}{n} + \frac{1}{2} \frac{\alpha}{(1-\alpha)^2} \left( \frac{R+i}{n} \right)^2.$$

To carry out the summation in Equation (35), we utilize the following results,

$$\sum_{j=0}^L \sum_{i=0}^{r-j} p(j, i) \frac{n-R-r+j}{n-R-i} = \frac{n-r}{n};$$

$$\sum_{j=0}^L \sum_{i=0}^{r-j} p(j,i) \frac{n-R-r+j}{n-R-i} \frac{i}{n} = \frac{r(R-L)}{n^2};$$

$$\sum_{j=0}^L \sum_{i=0}^{r-j} p(j,i) \frac{n-R-r+j}{n-R-i} \left(\frac{i}{n}\right)^2 = \frac{r(R-L)(n-R+L+r(R-L))}{n^3(n-r+1)}.$$

(36) in the paper can be obtained by simplifying and collecting terms together.

## A7. Pseudo Code for Simulation

### STEP 1: INITIALIZE

1.1. Populate

- A 2D array  $DocAgeAll(i, j)$  with age uniformly on  $[0, 1]$  for user  $i$  and document  $j$
- Two 1D arrays with  $size$  and  $delay$  log-normally distributed for each document

1.2. Store in an array  $GLRUList$  the indices of all documents according to sorted (small to large) GLRU ages

1.3. Store in a 2D array  $LRUAges$  the indices of all documents according to sorted (small to large) LRU ages for each user

### STEP 2: GENERATE INTER-EVENT TIME $\tau_k$ FOR NEXT ACCESS $k$

2.1. Generate  $\Delta x_{i,j}$  user  $i$  and document  $j$  using LRU age from  $DocAgeAll(i, j)$

2.2. Find inter-event time  $\tau_k = \min(\Delta x_{i,j})$ , and the user and document for that access:

$$(i_{\min}, j_{\min}) = \arg \min_{i,j} (\Delta x_{i,j})$$

### STEP 3: UPDATE CACHING SYSTEM

3.1. Fill proxy cache  $proxycache$  up to its capacity from  $GLRUList$

3.2. Fill user  $i_{\min}$ 's browser cache  $localcache$  up to its capacity from  $LRUAges$

3.3. IF  $localcache$  contains  $j_{\min}$ , or a local cache hit, THEN

$$localhit = localhit + \tau_k$$

ELSE

IF  $proxycache$  contains  $j_{\min}$ , or a proxy cache hit, THEN

$$proxyhit = proxyhit + \tau_k$$

$$browserdelay = browserdelay + delay(j_{\min})\tau_k Z_p$$

ELSE, or a cache miss,

$$browserdelay = browserdelay + delay(j_{\min})\tau_k$$

END IF

Update  $GLRUList$

END IF

3.4. Increase  $DocAgeAll(i, j)$  by  $\tau_k$

3.5. Reset  $DocAgeAll(i_{\min}, j_{\min})$  to 0

3.6. Update  $LRUAges$  for user  $i_{\min}$

### STEP 4: COLLECT STATISTICS

4.1. Repeat Steps 2 and 3 until the steady state

4.2. Reset  $localhit = 0$ ,  $browserdelay = 0$ , and  $proxyhit = 0$

4.3. Repeat Steps 2 and 3

4.4. Normalize  $localhit$ ,  $browserdelay$ , and  $proxyhit$  by the total time elapsed
